# Supplementary material for: Disappearance kinetics of 56 toxic semi-volatile organic compounds under common storage conditions
Source: Royal Society of Chemistry journal article supplement (doi:10.1039/c9em00545e), 2020-01-01
Supplement: c9em00545e2.xlsx [file c9em00545e2.xlsx]

## Sheet: Correlation analysis
Supplemntary Material Table S2. Estimating by Pearson’s correlation analysis SVOCs compatibility for 'single soup' analysis.
	stat \ p-value	nNDMA	b2CEE	1,3DCBz	1,4DCBz	1,2DCBz	b2CIPE	HCE	nNDnPA	NBz	IP	b2CEM	1,2,4TCBz	HCB	HCCP	2CN	2,6DTT	2,4DTT	4CPPE	AzBz	4BPPE	HCBz	B	3,3DCB	p	2Cp	2Np	2,4DMp	2,4DCp	4C3Mp	2,4,6TCp	2,4DNp	4Np	4,6D2Mp	PCp	DMP	DEP	DBP	BBP	BEP	DOP	N	ANY	AN	F	PA	A	FA	PY
N-Nitrosodimethylamine	nNDMA		1.8184e-13	1.0844e-08	7.0411e-09	5.835e-10	4.3017e-12	4.1594e-09	0.0030938	1.2778e-06	2.4262e-05	0.0007932	8.8144e-08	1.1634e-11	7.0013e-08	0.0057768	0.018006	0.020953	0.02192	0.019888	0.02218	0.025822	0.0003779	0.017452	3.7214e-08	7.4822e-13	9.7915e-05	0.0064212	0.0010926	0.016665	0.01296	0.019162	0.020915	0.024022	0.030384	0.023442	0.026992	0.024023	0.026499	0.022449	0.028496	2.6128e-06	0.0018696	0.014727	0.023152	0.026192	0.026439	0.024069	0.027839
bis(2-Chloroethyl)ether	b2CEE	0.99813		1.2504e-07	9.2879e-08	1.5501e-08	3.1625e-15	5.8911e-08	0.0017022	2.3789e-07	7.9163e-06	0.00037416	1.1038e-08	3.0716e-13	1.0221e-07	0.0033757	0.011489	0.013586	0.014341	0.012811	0.014507	0.017164	0.00016218	0.011111	7.449e-09	8.472e-11	3.5335e-05	0.003616	0.00053186	0.010664	0.0081812	0.0127	0.013563	0.016049	0.020516	0.01546	0.017992	0.015719	0.017648	0.014999	0.019187	5.9181e-07	0.00098837	0.0092942	0.015173	0.017357	0.017541	0.015843	0.018806
1,3-Dichlorobenzene	1,3DCBz	0.98301	0.97219		2.2374e-17	4.9635e-13	2.1283e-07	8.0609e-18	0.010453	5.1476e-05	0.00034454	0.0039496	8.6234e-06	1.7852e-07	2.3209e-06	0.017568	0.04682	0.052137	0.053809	0.049957	0.052678	0.059313	0.0029716	0.046019	2.8273e-06	7.9479e-10	0.0010358	0.022843	0.0053047	0.041666	0.033781	0.048225	0.053399	0.057009	0.071672	0.054218	0.063537	0.056556	0.062678	0.053915	0.067495	6.794e-05	0.0072287	0.037795	0.056598	0.062369	0.062718	0.055005	0.063189
1,4-Dichlorobenzene	1,4DCBz	0.98442	0.97381	0.99969		1.8242e-14	1.4559e-07	2.2592e-16	0.010517	4.7103e-05	0.00031145	0.0039541	7.4723e-06	1.236e-07	1.294e-06	0.017759	0.047502	0.052985	0.055017	0.050833	0.053386	0.060237	0.0029125	0.047015	3.1405e-06	8.0218e-10	0.0009567	0.022605	0.0052583	0.042109	0.03428	0.048959	0.054486	0.057768	0.072987	0.055065	0.064986	0.057494	0.063801	0.054534	0.06889	6.319e-05	0.007171	0.03836	0.057789	0.063676	0.064067	0.055791	0.064187
1,2-Dichlorobenzene	1,2DCBz	0.99055	0.98174	0.99771	0.99882		2.4999e-08	1.0674e-13	0.0088306	2.5034e-05	0.00018668	0.0031222	3.3414e-06	2.2921e-08	3.3213e-07	0.015173	0.041613	0.046847	0.049107	0.044964	0.047581	0.054082	0.0020566	0.041366	1.7363e-06	1.1884e-10	0.00062242	0.018547	0.0041256	0.037143	0.030085	0.043137	0.048133	0.05134	0.065125	0.049372	0.058421	0.051415	0.057029	0.048506	0.061744	3.6373e-05	0.0058175	0.033822	0.051572	0.057014	0.057422	0.050092	0.057731
bis(2-chloroisopropyl) ether	b2CIPE	0.99647	0.99917	0.96904	0.97132	0.9799		1.0918e-07	0.0013402	1.0741e-07	3.7635e-06	0.00028276	2.9562e-09	1.8458e-15	5.1308e-08	0.0027761	0.0099295	0.011834	0.012763	0.01124	0.012541	0.014944	0.00012412	0.0098998	1.0107e-08	5.4109e-10	2.0393e-05	0.0028972	0.00039784	0.0090319	0.0069597	0.011032	0.012082	0.013897	0.01833	0.0134	0.016151	0.013729	0.015618	0.013032	0.017147	2.8489e-07	0.00074885	0.0079641	0.013502	0.015515	0.015667	0.013691	0.016455
Hexachloroethane	HCE	0.98599	0.97611	0.99975	0.99951	0.99831	0.97294		0.0092257	3.8055e-05	0.00027494	0.0034297	6.0534e-06	9.491e-08	1.9656e-06	0.015671	0.042298	0.047297	0.048864	0.045294	0.048093	0.054292	0.0024295	0.041518	1.8499e-06	2.5141e-10	0.00086157	0.020446	0.0046474	0.037877	0.030579	0.043869	0.048327	0.052142	0.065481	0.049604	0.057912	0.051567	0.057067	0.049147	0.061512	5.1989e-05	0.0063366	0.03424	0.051441	0.056798	0.057166	0.050301	0.057785
N-Nitroso-di-n-propylamine	nNDnPA	0.7746	0.80196	0.70497	0.70456	0.71592	0.81188	0.71312		2.1746e-05	7.2208e-06	7.9978e-10	0.00010137	0.0011004	0.0078746	1.6339e-12	8.4182e-09	1.7851e-08	6.4475e-08	2.095e-08	2.0398e-08	4.1701e-08	1.0984e-07	2.8912e-08	0.00020491	0.0036032	8.3932e-07	4.4663e-10	1.0607e-09	2.82e-09	1.1187e-09	4.802e-08	5.4218e-08	4.6018e-08	2.8108e-07	2.6946e-08	1.729e-07	3.4614e-08	1.204e-07	7.2191e-08	3.7266e-07	1.2338e-05	3.6836e-13	1.9676e-09	7.5849e-08	1.3232e-07	1.2884e-07	2.8105e-08	1.2485e-07
Nitrobenzene	NBz	0.95548	0.96833	0.90515	0.90687	0.91825	0.97303	0.91088	0.92059		7.3301e-10	1.1995e-06	2.5989e-12	6.3765e-08	1.1207e-05	7.2845e-05	0.0005155	0.00068282	0.00080759	0.00065429	0.00076908	0.00099437	4.4922e-07	0.00055179	4.2989e-09	2.8509e-06	6.8452e-09	6.5085e-05	2.0887e-06	0.00045373	0.00030678	0.00061726	0.00073082	0.00086149	0.0013579	0.000855	0.0011663	0.00089491	0.0010981	0.00083995	0.0012746	2.8878e-15	8.0724e-06	0.00038334	0.00087504	0.0010929	0.0010963	0.00090278	0.0011925
Isophorone	IP	0.91878	0.93545	0.85901	0.86198	0.87602	0.94454	0.86555	0.93665	0.99011		4.0779e-07	1.7795e-08	2.6204e-06	4.7933e-05	3.2733e-05	0.00022693	0.00032792	0.00045769	0.00035691	0.00040588	0.00052102	1.3755e-07	0.00032332	9.0929e-07	4.5067e-05	1.6244e-10	2.0054e-05	5.0597e-07	0.00020814	0.00014729	0.00028305	0.00040529	0.00040551	0.00075934	0.00045618	0.00069396	0.00049014	0.00060933	0.00043941	0.0006944	6.7092e-10	2.6321e-06	0.0001969	0.00048851	0.00064166	0.00062688	0.00047738	0.00064339
bis(2-Chloroethoxy)methane	b2CEM	0.83182	0.85655	0.76225	0.76219	0.77415	0.86475	0.76948	0.98994	0.95605	0.96468		9.841e-06	0.0002195	0.0020564	1.5381e-08	1.0948e-06	1.8065e-06	2.7269e-06	1.6769e-06	2.1503e-06	3.441e-06	9.2495e-09	1.4974e-06	2.6736e-05	0.00098263	9.9737e-09	5.5618e-09	8.7739e-15	7.686e-07	3.7348e-07	2.2343e-06	2.42e-06	3.1473e-06	7.7379e-06	2.6173e-06	5.5796e-06	2.7934e-06	5.0404e-06	3.7089e-06	7.8399e-06	5.0288e-07	1.5479e-10	5.1456e-07	3.1675e-06	4.9375e-06	4.7522e-06	3.0354e-06	5.9551e-06
1,2,4-Trichlorobenzene	1,2,4TCBz	0.97408	0.98295	0.93431	0.9362	0.94587	0.98691	0.93889	0.89084	0.99681	0.98123	0.93251		1.0644e-09	1.7109e-06	0.00028247	0.0015906	0.0020084	0.0022977	0.001917	0.0021558	0.0027031	5.154e-06	0.0016754	5.6945e-10	2.5763e-07	1.8298e-07	0.00027724	1.5597e-05	0.0013689	0.00097387	0.001815	0.0021449	0.0024114	0.003636	0.0023473	0.0031519	0.0024723	0.0029884	0.0023263	0.0034212	2.0559e-11	4.3917e-05	0.0011833	0.00247	0.0029848	0.0029946	0.0024456	0.003151
Hexachlorobutadiene	HCB	0.99569	0.99792	0.97012	0.97225	0.98025	0.99925	0.97369	0.81966	0.97572	0.94848	0.87175	0.98934		5.956e-08	0.0023057	0.0086958	0.010371	0.011265	0.0098569	0.010906	0.013042	0.00010361	0.0087945	5.1664e-09	5.2214e-10	1.5163e-05	0.002452	0.00031076	0.0077848	0.0059233	0.0095256	0.010708	0.012024	0.016164	0.011634	0.01434	0.01202	0.013738	0.011336	0.015257	1.5557e-07	0.00059337	0.0068647	0.011973	0.013771	0.013878	0.011938	0.014334
Hexachlorocyclopentadiene	HCCP	0.97526	0.9733	0.94974	0.95537	0.96612	0.97676	0.95141	0.72309	0.93069	0.90653	0.79372	0.95276	0.97605		0.014063	0.03851	0.044522	0.049829	0.043959	0.045921	0.053052	0.001311	0.040787	8.0895e-06	3.7546e-07	0.00016451	0.011399	0.0023081	0.034541	0.02864	0.040544	0.046953	0.047765	0.06337	0.048739	0.060132	0.05097	0.057506	0.047884	0.062028	1.8679e-05	0.0046407	0.032665	0.051714	0.05796	0.058142	0.050046	0.058937
2-Chloronaphthalene	2CN	0.7415	0.77027	0.66809	0.66727	0.67902	0.77985	0.67664	0.99709	0.89808	0.91361	0.98177	0.86478	0.78855	0.68451		3.2102e-10	6.3757e-10	4.9277e-09	5.3836e-10	4.548e-10	1.6353e-09	4.2518e-07	1.1837e-09	0.00046794	0.0065553	4.3612e-06	2.183e-10	1.3282e-08	3.5434e-11	2.6847e-12	2.8962e-09	3.0716e-09	1.6627e-09	1.801e-08	6.7437e-10	1.5973e-08	1.2133e-09	8.8632e-09	5.6271e-09	6.5333e-08	4.4524e-05	3.423e-11	1.2456e-11	6.5143e-09	9.5661e-09	9.7083e-09	1.0268e-09	9.1182e-09
2,6-Dinitrotoluene	2,6DTT	0.66622	0.69862	0.58261	0.58116	0.59419	0.70835	0.59261	0.98385	0.84651	0.87085	0.95686	0.80483	0.71689	0.60159	0.99162		4.4193e-17	4.442e-12	8.6761e-14	1.9336e-12	1.405e-12	4.0757e-06	7.7701e-13	0.002226	0.020142	5.3585e-05	6.4684e-09	8.7358e-07	4.6773e-13	1.1333e-12	5.6694e-12	2.7347e-13	8.5514e-13	1.2656e-11	4.0838e-12	2.3096e-11	2.68e-12	6.6947e-12	2.0818e-11	2.5956e-10	0.0003752	6.5906e-08	5.811e-13	4.429e-12	8.2842e-12	7.2922e-12	1.2437e-11	2.3713e-11
2,4-Dinitrotoluene	2,4DTT	0.65438	0.68697	0.57169	0.57002	0.58256	0.6966	0.5816	0.98122	0.83709	0.86047	0.95224	0.79477	0.70549	0.58761	0.99038	0.99965		2.0427e-12	5.7291e-15	1.0979e-13	3.6975e-14	7.2562e-06	5.0151e-13	0.0027217	0.023209	7.9409e-05	1.4123e-08	1.4822e-06	1.9482e-13	1.0829e-12	1.1898e-11	1.1583e-13	2.0737e-13	3.2124e-12	2.6001e-13	6.445e-12	1.264e-13	1.3454e-12	1.1675e-11	2.2234e-10	0.00049715	1.1902e-07	2.2293e-13	2.0363e-12	1.7503e-12	1.8887e-12	1.3138e-12	5.2143e-12
4-Chlorophenyl-phenyl ether	4CPPE	0.65077	0.6831	0.56842	0.5661	0.57781	0.69137	0.57832	0.97567	0.83117	0.85032	0.94806	0.78871	0.69996	0.57633	0.9855	0.99645	0.99696		7.3661e-14	2.8407e-11	1.0302e-11	8.6698e-06	7.4785e-14	0.002893	0.024142	0.00012093	4.3961e-08	2.7535e-06	1.239e-10	1.8521e-10	4.7726e-11	3.4347e-15	1.2485e-10	9.7599e-13	3.7529e-11	6.7584e-17	4.9061e-12	5.3405e-15	7.3127e-13	3.4789e-13	0.0005929	3.6159e-07	1.7381e-11	3.3494e-19	1.137e-16	6.7514e-17	7.9297e-11	6.7844e-13
Azobenzene	AzBz	0.65851	0.69111	0.57607	0.5743	0.58663	0.7001	0.58591	0.9806	0.83856	0.85796	0.95295	0.79682	0.70883	0.58886	0.9907	0.99838	0.99906	0.99844		5.7113e-14	6.6642e-14	6.9712e-06	1.4687e-14	0.0025484	0.022079	8.2011e-05	1.3794e-08	1.508e-06	1.2058e-12	2.1898e-12	2.7786e-11	1.0718e-14	4.1619e-12	9.3906e-13	1.5842e-13	4.1348e-13	9.9452e-15	9.3369e-14	2.7791e-12	9.2016e-11	0.00046967	1.1953e-07	4.1994e-14	1.1349e-13	3.7546e-14	6.6487e-14	8.8706e-13	1.0663e-12
4-Bromophenyl-phenylether	4BPPE	0.64982	0.68227	0.57062	0.56924	0.581	0.6926	0.57992	0.9807	0.83292	0.85406	0.95051	0.7916	0.70213	0.58454	0.99101	0.99699	0.99831	0.99485	0.99851		4.5056e-17	1.2899e-05	1.4923e-11	0.0030358	0.024456	9.1191e-05	1.845e-08	1.7692e-06	9.027e-15	4.2039e-13	1.6568e-10	1.4288e-11	8.3983e-13	2.8812e-11	1.2618e-19	4.2965e-11	5.32e-16	8.1093e-12	2.4044e-11	1.7007e-09	0.00054104	1.0604e-07	1.079e-14	3.0189e-11	1.1639e-11	1.6217e-11	1.9737e-16	4.6949e-12
Hexachlorobenzene	HCBz	0.63726	0.66985	0.55813	0.55647	0.56789	0.68012	0.56749	0.97771	0.82352	0.84616	0.94554	0.78113	0.68986	0.56989	0.98838	0.99718	0.99864	0.99579	0.99847	0.99964		1.8145e-05	1.4974e-11	0.0036977	0.028244	0.00012907	3.8689e-08	2.9054e-06	1.4169e-13	3.5926e-12	1.1715e-10	6.7627e-12	5.1681e-13	9.5303e-12	3.1056e-17	1.0598e-11	4.4125e-16	1.8054e-12	9.9333e-12	6.5228e-10	0.00071035	2.2464e-07	2.2056e-13	9.2057e-12	3.0098e-12	3.847e-12	7.0889e-16	9.7829e-13
Benzidine	B	0.85624	0.87961	0.77657	0.77755	0.79371	0.88614	0.78614	0.97291	0.96398	0.97165	0.98354	0.94087	0.89034	0.81277	0.96438	0.94363	0.93659	0.93424	0.9371	0.92866	0.92349		4.5059e-06	1.4176e-05	0.00056563	1.7075e-08	2.4498e-07	1.4899e-08	5.8583e-06	3.1597e-06	5.3576e-06	6.4761e-06	1.2549e-05	1.7872e-05	1.6099e-05	1.619e-05	1.4818e-05	1.3782e-05	9.8324e-06	1.4705e-05	3.818e-07	3.4291e-08	4.3167e-06	1.004e-05	1.4505e-05	1.4677e-05	1.8991e-05	1.8105e-05
3,3'-Dichlorobenzidine	3,3DCB	0.66859	0.70089	0.58433	0.5822	0.59477	0.70855	0.59441	0.9793	0.84428	0.86089	0.95402	0.80264	0.71618	0.59612	0.98911	0.99749	0.9977	0.99843	0.99887	0.99547	0.99547	0.94247		0.0020743	0.019352	7.379e-05	1.8031e-08	1.3996e-06	3.9303e-11	2.4544e-11	2.3178e-11	1.792e-16	4.0153e-11	1.8908e-12	2.6163e-11	6.7979e-13	7.7925e-12	2.1798e-12	1.8589e-11	5.6947e-11	0.00040776	1.5176e-07	4.214e-12	1.2527e-13	1.3944e-13	2.4647e-13	8.8944e-11	3.2519e-11
Phenol	p	0.97822	0.98424	0.94768	0.94655	0.95262	0.98325	0.95201	0.87358	0.98589	0.95845	0.91714	0.9906	0.98536	0.93516	0.84962	0.79015	0.7808	0.77787	0.78391	0.77553	0.76565	0.92727	0.79333		3.0378e-08	3.4224e-06	0.00060741	4.5812e-05	0.0020662	0.0014031	0.0024403	0.0026903	0.0033084	0.0045184	0.0032298	0.0038727	0.003354	0.0038979	0.0033043	0.0043137	9.1092e-09	0.00011001	0.0017061	0.0031483	0.0037297	0.0037436	0.0034436	0.0042614
2-Chlorophenol	2Cp	0.99751	0.99358	0.98995	0.98993	0.99313	0.99069	0.99202	0.76698	0.94759	0.90772	0.82396	0.96782	0.99076	0.96527	0.73416	0.65751	0.64612	0.64288	0.65019	0.64181	0.6296	0.84346	0.66065	0.97909		0.00016608	0.0079462	0.0013683	0.018521	0.014264	0.020971	0.023219	0.026189	0.033263	0.025551	0.029585	0.026489	0.029405	0.025157	0.031532	4.891e-06	0.0022733	0.016363	0.025568	0.028804	0.028967	0.026379	0.030691
2-Nitrophenol	2Np	0.89162	0.91224	0.82197	0.82497	0.84026	0.92163	0.82883	0.95912	0.98451	0.99269	0.98329	0.96997	0.92625	0.87925	0.94285	0.90435	0.89624	0.88676	0.89554	0.89321	0.88521	0.98138	0.8978	0.9456	0.87901		1.506e-06	8.3694e-09	4.2843e-05	2.8029e-05	7.1752e-05	0.00010046	9.8179e-05	0.00020534	0.00010705	0.00019432	0.00011853	0.0001681	0.00011598	0.00021792	2.8703e-09	1.6087e-07	3.907e-05	0.00013022	0.00017283	0.00017092	0.00011669	0.00018177
2,4-Dimethylphenol	2,4DMp	0.73537	0.7668	0.64742	0.64828	0.66394	0.7778	0.65633	0.99105	0.90043	0.9219	0.98514	0.86531	0.78571	0.69915	0.99224	0.98468	0.98208	0.97748	0.98216	0.98109	0.97805	0.96814	0.98118	0.84108	0.72254	0.95397		1.4958e-09	4.345e-09	2.5233e-09	2.6392e-08	2.7813e-08	2.8576e-08	1.0754e-07	2.9488e-08	1.143e-07	3.1587e-08	7.8077e-08	5.0643e-08	2.0385e-07	4.0811e-05	6.2616e-10	3.1905e-09	4.8034e-08	8.2312e-08	7.714e-08	4.1827e-08	1.0412e-07
2,4-Dichlorophenol	2,4DCp	0.81993	0.84549	0.74632	0.74681	0.75997	0.85468	0.75361	0.98935	0.95081	0.96311	0.99898	0.92583	0.86204	0.7885	0.9823	0.95879	0.95412	0.94796	0.95396	0.95244	0.94739	0.98189	0.95465	0.9074	0.81104	0.98387	0.98859		5.8251e-07	2.8133e-07	1.6414e-06	2.2059e-06	2.1954e-06	6.4367e-06	2.1871e-06	5.6071e-06	2.5401e-06	4.8483e-06	3.3832e-06	7.8784e-06	9.5047e-07	1.2667e-10	4.4982e-07	3.1411e-06	4.7949e-06	4.576e-06	2.6781e-06	5.6073e-06
4-Chloro-3-methylphenol	4C3Mp	0.67208	0.70364	0.59407	0.59305	0.60499	0.71448	0.60315	0.98704	0.85059	0.87317	0.95984	0.81102	0.7238	0.6117	0.99461	0.99773	0.9981	0.99308	0.99726	0.99897	0.99822	0.9393	0.9945	0.7935	0.66405	0.90868	0.98586	0.96204		3.0774e-15	9.0867e-11	5.1798e-11	8.0788e-13	2.2146e-10	3.0941e-14	3.3495e-10	6.5515e-13	8.5137e-11	7.0361e-11	3.7904e-09	0.00031349	2.1668e-08	2.3031e-15	1.4141e-10	1.312e-10	1.4813e-10	1.8454e-13	4.9142e-11
2,4,6-Trichlorophenol	2,4,6TCp	0.6903	0.72073	0.61373	0.61239	0.6241	0.7306	0.62266	0.98923	0.86241	0.88201	0.96531	0.8243	0.74006	0.6284	0.99679	0.9973	0.99732	0.99249	0.99691	0.99778	0.99659	0.94648	0.99499	0.81002	0.68349	0.91633	0.98732	0.96724	0.99917		4.1321e-11	5.6752e-11	1.4796e-12	2.6982e-10	7.0239e-13	6.1972e-10	7.1913e-12	2.3347e-10	1.7719e-10	6.5191e-09	0.00020698	7.8925e-09	4.6881e-15	2.4581e-10	2.4756e-10	2.5372e-10	4.9538e-12	2.0293e-10
2,4-Dinitrophenol	2,4DNp	0.66142	0.69172	0.57965	0.57812	0.5907	0.70136	0.58906	0.97707	0.84054	0.86472	0.95013	0.7992	0.71106	0.5967	0.98697	0.99627	0.99567	0.99428	0.99487	0.99266	0.99315	0.9404	0.99505	0.78593	0.65432	0.89839	0.97968	0.95316	0.99349	0.99444		1.1204e-11	1.3315e-12	4.6872e-12	1.836e-10	1.5191e-10	4.2772e-10	8.9741e-11	1.1521e-11	2.6247e-10	0.00045408	1.6922e-07	1.1794e-10	5.4006e-11	7.4344e-11	4.955e-11	7.8467e-10	1.0009e-10
4-Nitrophenol	4Np	0.65453	0.68709	0.56921	0.56711	0.57984	0.69518	0.57943	0.9765	0.83472	0.85411	0.94931	0.79183	0.70336	0.58233	0.98681	0.99797	0.99829	0.99915	0.99894	0.99551	0.99613	0.93804	0.99953	0.78135	0.64609	0.89104	0.97946	0.95026	0.99419	0.99408	0.99572		2.0339e-11	1.2751e-13	2.4298e-11	3.2477e-14	4.8399e-12	9.9758e-14	3.7107e-12	7.2294e-12	0.00054577	2.7438e-07	1.0157e-11	4.8851e-15	5.7367e-15	9.5369e-15	7.6755e-11	5.5816e-12
4,6-Dinitro-2-methylphenol	4,6D2Mp	0.64329	0.67488	0.56235	0.56095	0.57328	0.68536	0.57168	0.97727	0.82883	0.85409	0.94652	0.78648	0.69551	0.58061	0.98834	0.99744	0.99808	0.99307	0.99649	0.99745	0.99769	0.92906	0.99448	0.77128	0.63606	0.89156	0.97935	0.9503	0.99747	0.99715	0.99721	0.99518		5.8826e-12	8.1179e-13	1.9909e-10	1.1512e-11	6.056e-11	4.1919e-11	1.9465e-09	0.00062453	1.7752e-07	7.5507e-12	1.2107e-10	7.1405e-11	6.4555e-11	9.8941e-12	4.1587e-11
Pentachlorophenol	PCp	0.62322	0.65606	0.53722	0.53515	0.54796	0.66485	0.54735	0.96724	0.81135	0.83337	0.93575	0.76651	0.67435	0.55096	0.98118	0.99562	0.99667	0.99738	0.9974	0.99483	0.99586	0.92372	0.997	0.75513	0.61513	0.87352	0.97302	0.93812	0.99222	0.99191	0.99641	0.99825	0.99624		3.1343e-11	4.9532e-13	1.8649e-11	2.8226e-13	3.4029e-12	1.7459e-11	0.0010242	9.239e-07	1.2052e-10	1.0514e-12	9.9946e-14	9.4001e-14	1.4147e-10	2.1677e-12
Dimethylphthalate	DMP	0.64531	0.67764	0.56763	0.56601	0.57727	0.68795	0.57679	0.97959	0.82911	0.85042	0.94849	0.78773	0.69777	0.57858	0.99027	0.9965	0.99799	0.99455	0.99818	0.99989	0.99967	0.92534	0.99493	0.77248	0.63815	0.88959	0.97922	0.95034	0.99868	0.99754	0.99251	0.995	0.99747	0.99474		5.1068e-11	1.2387e-15	1.1369e-11	3.551e-11	1.9864e-09	0.00059989	1.3894e-07	4.2468e-14	4.0612e-11	1.4724e-11	1.8432e-11	6.9648e-17	5.0046e-12
Diethylphthalate	DEP	0.6335	0.66627	0.55067	0.54819	0.55975	0.67441	0.56068	0.97031	0.8174	0.83653	0.9399	0.77369	0.68311	0.55665	0.98163	0.99505	0.99617	0.99961	0.99779	0.9944	0.99577	0.92526	0.99756	0.76327	0.62556	0.87498	0.97269	0.93984	0.99155	0.99044	0.99279	0.99867	0.99239	0.99771	0.9942		5.8061e-12	1.6901e-15	1.3715e-12	3.7109e-13	0.00086945	8.2414e-07	7.1042e-11	4.0531e-17	1.0524e-18	5.1162e-18	9.0469e-11	4.8063e-13
Di-n-butylphthalate	DBP	0.64329	0.67642	0.5632	0.56145	0.57313	0.68623	0.57282	0.97854	0.82744	0.84814	0.94781	0.78533	0.69553	0.57402	0.98906	0.99679	0.99826	0.99637	0.99895	0.99942	0.99944	0.9266	0.99602	0.7706	0.6351	0.88723	0.97893	0.94881	0.99758	0.99609	0.99112	0.99638	0.9957	0.99526	0.99931	0.99625		7.574e-13	2.111e-11	5.8274e-10	0.00063634	1.9582e-07	9.6672e-14	5.5897e-12	1.4671e-12	2.4657e-12	1.2219e-15	1.0591e-12
Butylbenzylphthalate	BBP	0.63507	0.66775	0.55216	0.55022	0.56231	0.67689	0.56224	0.9724	0.81974	0.84098	0.94113	0.7763	0.68618	0.56143	0.98368	0.99614	0.9972	0.99907	0.99836	0.99599	0.99703	0.92768	0.99692	0.76293	0.6261	0.87871	0.97471	0.9416	0.99358	0.99214	0.99351	0.99834	0.994	0.99795	0.99571	0.99926	0.99751		1.1524e-13	1.153e-12	0.00081417	5.519e-07	2.2835e-11	1.2723e-14	6.8337e-16	2.8314e-15	2.1319e-11	1.3705e-15
bis(2-Ethylhexyl)phthalate	BEP	0.64884	0.67986	0.56822	0.56702	0.57906	0.68991	0.57773	0.97511	0.82975	0.8516	0.9447	0.78814	0.69953	0.58036	0.98511	0.99516	0.99569	0.99752	0.99676	0.99501	0.99582	0.93252	0.99527	0.77134	0.63945	0.88774	0.97682	0.94573	0.99382	0.99256	0.9957	0.99657	0.99443	0.99663	0.99461	0.99719	0.99514	0.99829		5.1408e-12	0.00061517	2.9239e-07	3.468e-11	8.0328e-13	8.0016e-13	9.4116e-13	7.4233e-11	2.7581e-14
Di-n-octylphthalate	DOP	0.62883	0.66131	0.54399	0.5417	0.55379	0.66993	0.5542	0.96532	0.81389	0.8365	0.93557	0.7696	0.67861	0.55329	0.9756	0.99197	0.99221	0.99787	0.99348	0.98829	0.99034	0.92672	0.99407	0.75761	0.61993	0.87194	0.9693	0.93551	0.98624	0.98466	0.99195	0.99608	0.98797	0.99532	0.98792	0.99784	0.99055	0.99729	0.99634		0.00097999	1.5671e-06	1.7285e-09	5.0802e-13	1.6329e-12	1.2826e-12	3.2053e-09	8.443e-12
Naphthalene	N	0.94851	0.96192	0.89954	0.90103	0.91171	0.96715	0.90495	0.92931	0.99918	0.99028	0.96315	0.99517	0.97094	0.92303	0.90795	0.85646	0.84768	0.84189	0.8495	0.84493	0.83571	0.96515	0.85392	0.98359	0.94149	0.98699	0.90959	0.95808	0.86179	0.87331	0.85057	0.84464	0.84014	0.8224	0.8415	0.8285	0.83951	0.83088	0.84065	0.82407		4.1966e-06	0.00026062	0.00064517	0.00081152	0.00080967	0.00063262	0.00087327
Acenaphthylene	ANY	0.79792	0.82375	0.72832	0.72881	0.7411	0.83386	0.73615	0.99784	0.93519	0.94844	0.99276	0.90821	0.84187	0.75368	0.99465	0.97556	0.97247	0.96553	0.97244	0.9731	0.9687	0.97858	0.97108	0.88896	0.78919	0.97074	0.99042	0.99305	0.98047	0.98406	0.97044	0.9674	0.97015	0.95832	0.97159	0.95927	0.96955	0.96245	0.96698	0.9536	0.94329		1.722e-08	4.265e-07	6.1982e-07	6.2423e-07	1.6111e-07	5.3578e-07
Acenaphthene	AN	0.68118	0.71264	0.60335	0.60196	0.61362	0.7224	0.6125	0.98794	0.85581	0.87463	0.96298	0.81683	0.73142	0.61677	0.99563	0.99763	0.99805	0.99533	0.9986	0.99893	0.99805	0.94297	0.99648	0.80186	0.67344	0.9104	0.98671	0.96397	0.99922	0.9991	0.99314	0.99581	0.99605	0.99311	0.9986	0.99381	0.99835	0.99507	0.99464	0.98825	0.86705	0.98135		2.3519e-11	2.4121e-11	2.8372e-11	1.8877e-13	2.5359e-11
Fluorene	F	0.64633	0.67902	0.56312	0.56091	0.57281	0.68741	0.57307	0.97486	0.82826	0.84824	0.94645	0.78537	0.6958	0.57253	0.98466	0.99645	0.99696	0.99987	0.99829	0.99478	0.99589	0.93223	0.99826	0.77374	0.63809	0.885	0.97707	0.94655	0.99289	0.99206	0.99414	0.99909	0.99311	0.99734	0.99446	0.99965	0.99628	0.9989	0.99748	0.9977	0.83904	0.96436	0.99504		5.9541e-17	1.0539e-17	7.1918e-11	1.2536e-12
Phenanthrene	PA	0.63606	0.66901	0.5527	0.55043	0.56234	0.67738	0.56274	0.97187	0.81992	0.83922	0.94138	0.77635	0.68601	0.56059	0.98343	0.99597	0.99705	0.99957	0.99863	0.99569	0.99671	0.92692	0.99822	0.76521	0.6279	0.878	0.97444	0.94173	0.993	0.99204	0.99375	0.99906	0.9938	0.99834	0.99548	0.99983	0.99715	0.99939	0.99748	0.99709	0.831	0.96156	0.99501	0.99962		8.1158e-20	3.1528e-11	2.6052e-13
Anthracene	A	0.63526	0.66821	0.55209	0.54976	0.56159	0.67666	0.56206	0.97202	0.8198	0.84002	0.94184	0.7762	0.68546	0.56026	0.98338	0.99607	0.997	0.99961	0.99847	0.99539	0.99655	0.92675	0.99801	0.76502	0.62741	0.87828	0.97477	0.94228	0.99282	0.99201	0.99424	0.99896	0.99392	0.99836	0.99527	0.99977	0.99684	0.99918	0.99739	0.99723	0.83108	0.9615	0.99485	0.99973	0.9999		3.9336e-11	4.3083e-13
Fluoranthene	FA	0.64313	0.67584	0.56612	0.56463	0.5758	0.68642	0.57537	0.97942	0.82712	0.84898	0.94692	0.78583	0.696	0.57589	0.98942	0.99563	0.99721	0.99367	0.99743	0.99952	0.99938	0.92277	0.99352	0.76927	0.63545	0.8876	0.9777	0.94825	0.99812	0.99637	0.98997	0.99371	0.99583	0.99289	0.99961	0.9935	0.99931	0.99513	0.99375	0.9867	0.83971	0.97073	0.99811	0.99379	0.99474	0.9945		9.8822e-12
Pyrene	PY	0.63085	0.66287	0.55127	0.54955	0.56101	0.67302	0.56091	0.9722	0.81653	0.83913	0.9391	0.7737	0.68314	0.55881	0.98359	0.99503	0.99633	0.99756	0.99733	0.99641	0.99737	0.92352	0.9947	0.75825	0.62233	0.87671	0.9732	0.93984	0.99425	0.99236	0.99337	0.99628	0.99444	0.99692	0.99636	0.99772	0.99733	0.99929	0.99871	0.99596	0.82834	0.96268	0.99496	0.99724	0.99799	0.99777	0.99583
Benzo[a]anthracene	B[a]A	0.63644	0.66892	0.5568	0.55523	0.5666	0.67927	0.56597	0.97711	0.82337	0.84632	0.94576	0.78092	0.68882	0.57014	0.98735	0.99681	0.998	0.99688	0.99823	0.99871	0.99934	0.92368	0.99585	0.76462	0.62867	0.88543	0.97868	0.94762	0.99738	0.99566	0.99452	0.99658	0.99724	0.99638	0.9987	0.99679	0.99841	0.99733	0.99734	0.99264	0.83555	0.9678	0.99745	0.99717	0.99748	0.99753	0.99822	0.99769
Chrysene	C	0.63403	0.66654	0.5548	0.55312	0.56436	0.67677	0.56394	0.97611	0.82104	0.84326	0.94435	0.77856	0.68645	0.56665	0.98707	0.99632	0.99773	0.99667	0.99827	0.99889	0.99942	0.92174	0.99576	0.76288	0.62657	0.88313	0.97768	0.9462	0.99719	0.99563	0.99419	0.99636	0.9972	0.99656	0.99898	0.9967	0.99859	0.99724	0.99703	0.99206	0.83348	0.96696	0.99742	0.99691	0.9975	0.99751	0.99846	0.99767
Benzo[b]fluoranthene	B[b]FA	0.61955	0.65207	0.53528	0.53267	0.54366	0.66017	0.54451	0.95697	0.80616	0.82801	0.931	0.76199	0.66788	0.54802	0.96559	0.98263	0.98256	0.99128	0.98443	0.97837	0.9811	0.9142	0.98693	0.75039	0.6122	0.86537	0.96387	0.93119	0.97654	0.97488	0.98516	0.98837	0.97873	0.98671	0.97814	0.9912	0.98011	0.98737	0.98837	0.9939	0.81694	0.94351	0.97922	0.99202	0.98989	0.99076	0.9766	0.98529
Benzo[k]fluoranthene	B[k]FA	0.60788	0.64042	0.52352	0.52072	0.5314	0.64845	0.53242	0.94986	0.79653	0.81799	0.92496	0.75198	0.65643	0.5372	0.95937	0.97707	0.97718	0.98745	0.97969	0.97331	0.97619	0.90611	0.9825	0.7408	0.60109	0.85719	0.95916	0.92544	0.97105	0.96942	0.98128	0.98396	0.97392	0.98313	0.97321	0.98746	0.97504	0.98308	0.98438	0.99094	0.8078	0.93627	0.974	0.98811	0.98598	0.98698	0.97115	0.98117
Benzo[a]pyrene,	B[a]P	0.62137	0.65246	0.54013	0.53776	0.54765	0.66074	0.54807	0.94404	0.80373	0.82532	0.9243	0.76182	0.66803	0.55834	0.94912	0.96391	0.96304	0.97474	0.96541	0.95874	0.96182	0.90157	0.96901	0.74785	0.61464	0.86156	0.95297	0.92447	0.95821	0.95647	0.96911	0.97016	0.95948	0.96712	0.9584	0.97392	0.95977	0.96809	0.97229	0.97854	0.81477	0.93035	0.96136	0.976	0.97195	0.97349	0.95663	0.96608
Indeno[1,2,3-cd]pyrene	I[123cd]P	0.57118	0.60466	0.4897	0.48731	0.49715	0.60999	0.49781	0.88585	0.74428	0.76115	0.85946	0.70269	0.61047	0.50805	0.88927	0.9067	0.90626	0.91206	0.90716	0.90232	0.90558	0.82787	0.91395	0.69287	0.56571	0.80043	0.88985	0.86035	0.90051	0.89862	0.90575	0.91197	0.90255	0.90489	0.90202	0.91324	0.9017	0.90111	0.90422	0.90604	0.754	0.86845	0.90359	0.91734	0.91284	0.91476	0.90336	0.89441
Dibenz[a,h]anthracene	D[ah]A	0.5626	0.59643	0.47975	0.47735	0.48758	0.60107	0.48827	0.87507	0.73337	0.74851	0.84665	0.69139	0.60019	0.49641	0.87917	0.89824	0.89787	0.90373	0.89892	0.89355	0.89676	0.81889	0.90688	0.68312	0.55679	0.78821	0.87836	0.84737	0.89134	0.88933	0.89711	0.9044	0.89381	0.89708	0.89313	0.90529	0.89297	0.89259	0.89537	0.89771	0.74204	0.85734	0.89444	0.90923	0.90508	0.90671	0.89454	0.88529
1,12-Benzoperylene	1,12BP	0.57643	0.60909	0.49738	0.49518	0.50468	0.61449	0.50521	0.8837	0.7459	0.76202	0.85743	0.7056	0.61507	0.51425	0.8866	0.90213	0.90163	0.90694	0.90263	0.89833	0.90138	0.82513	0.90908	0.69524	0.57125	0.80045	0.88622	0.85824	0.89674	0.8952	0.90164	0.90686	0.89857	0.89976	0.89807	0.90801	0.89722	0.89591	0.89997	0.89995	0.75578	0.86706	0.89983	0.9124	0.9078	0.90982	0.89966	0.88948
[truncated: 8 more columns]
